# Supplementary material for: Human Pluripotent Stem Cell-Derived Medium Spiny Neuron-like Cells Exhibit Gene Desensitization
Source: MDPI journal article supplement (doi:10.3390/cells11091411), 2022-04-21
Supplement: s1 [file s1]

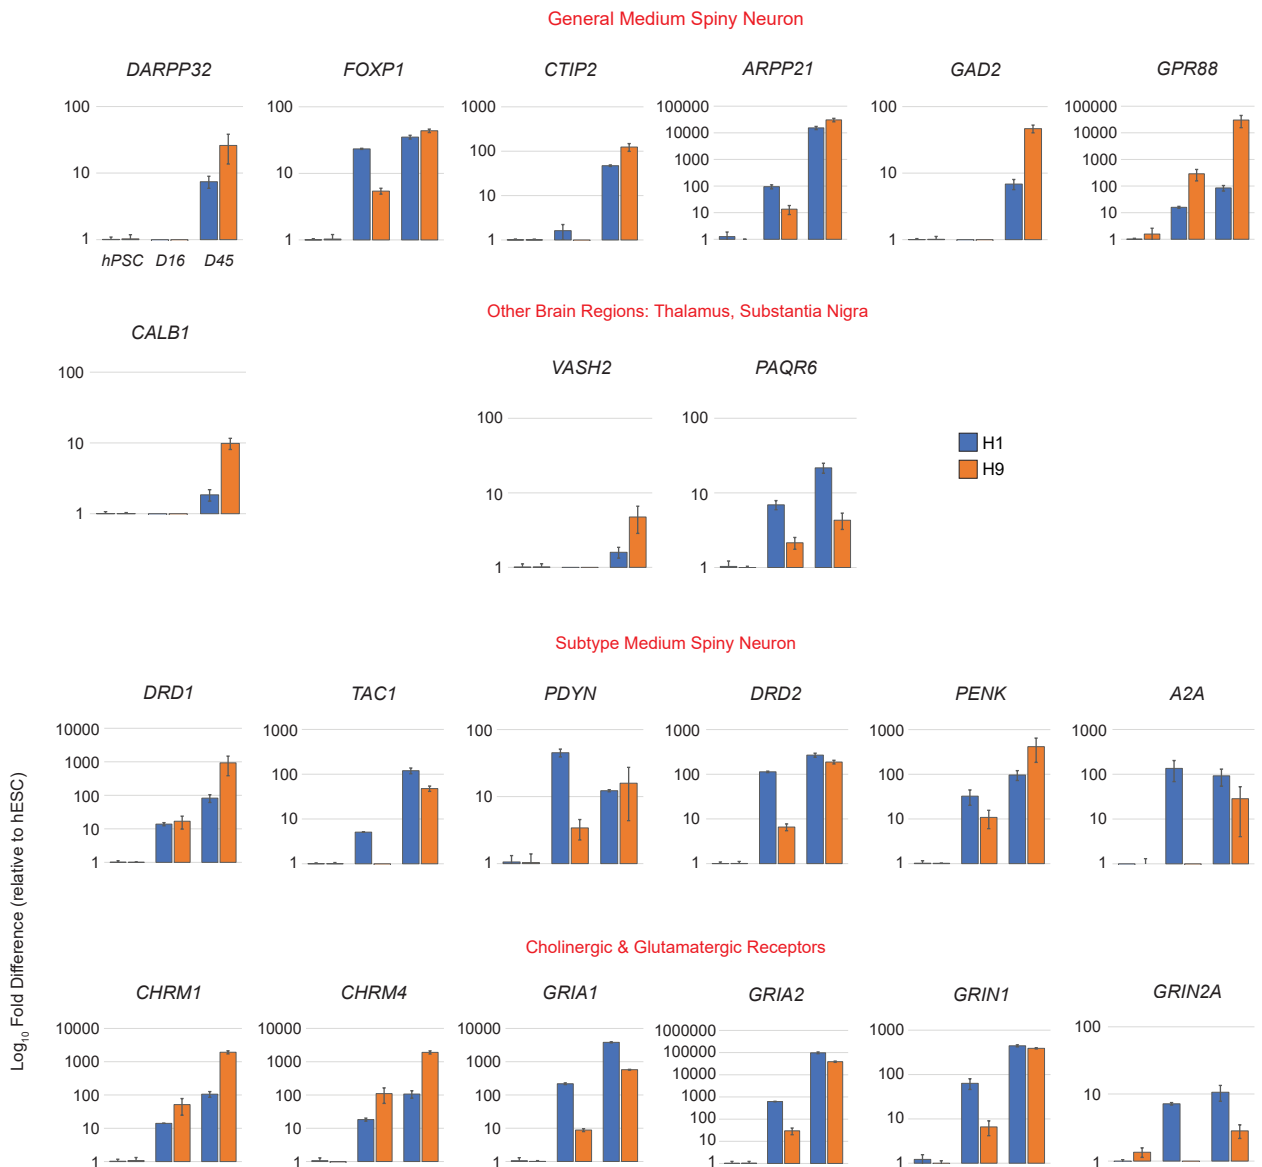

**Figure S1.** QRT-PCR of Target Genes as Compared to GUSB. QRT-PCR of RNA isolated from H1 (blue) and H9 (orange) hPSCs and hPSCs differentiated into hMSN-like cells at DIV 16 (D16) and DIV 45 (D45), for genes of interest. Values were normalized to GUSB mRNA levels in the same samples and expressed as normalized Log<sub>10</sub> fold change values in hMSN-like versus hPSC cells. Gene categories are labeled in red. n = 3-4 independent replicates & 2 technical replicates. Error bars = Standard error.

DAPI FOSB MAP2 DARPP32

A

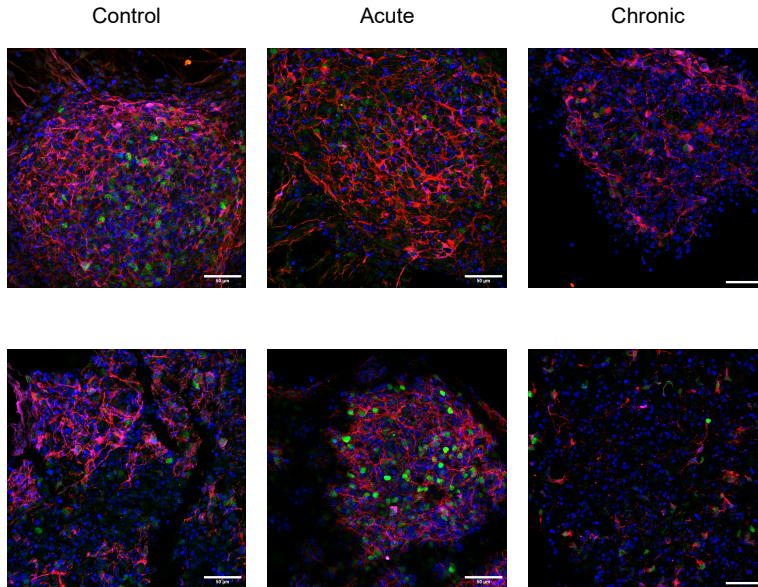

B

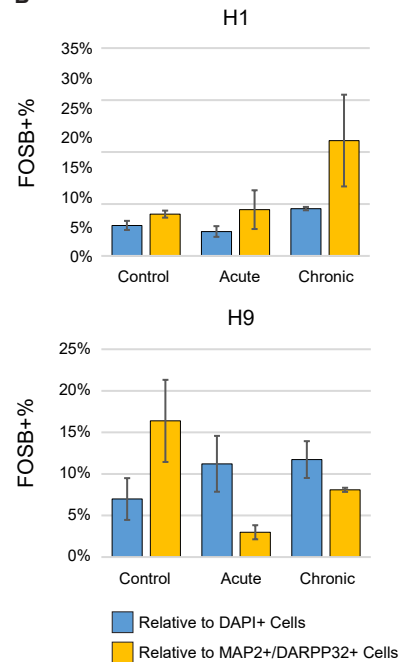

**Figure S2.** FOSB Immunostaining highlights differential responses to acute and chronic dopamine. (A) Representative immunostaining images of FOSB+ cells after control 100  $\mu$ M Ascorbic Acid, 1 mM Acute and 1 mM Chronic dopamine doses on DIV45 for H1 (top) and H9 (bottom) hMSN-like cells. (B) Quantification of immunostained samples. Error bars are standard deviation. n = 2-3 independent replicates. Scale bar = 50  $\mu$ m.

**A**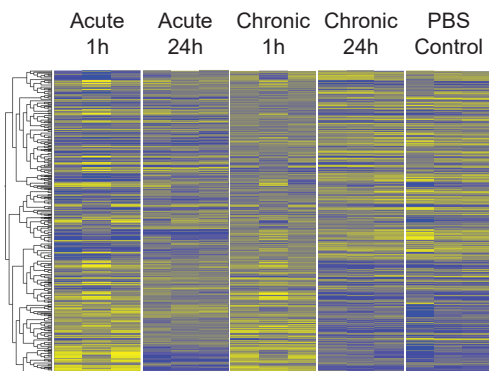

-2.5 0 2.5  
Log Counts Per Million

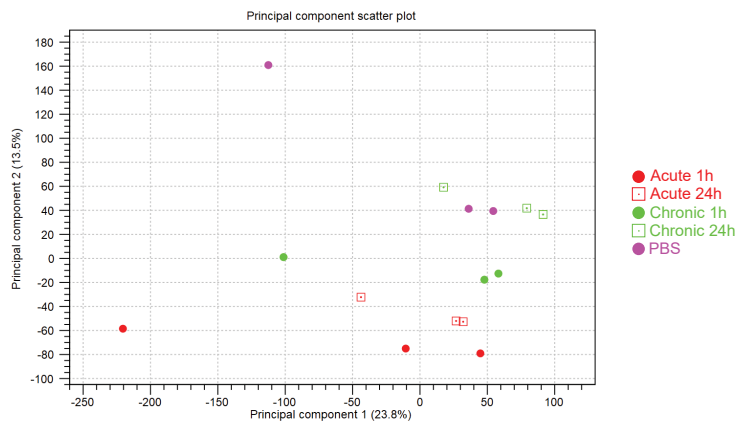**B**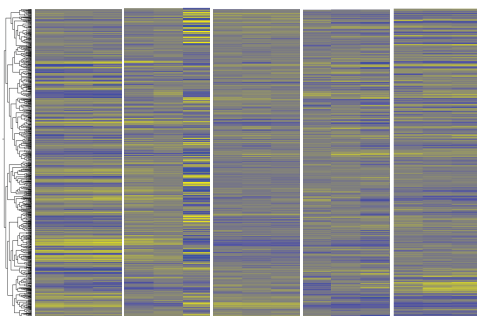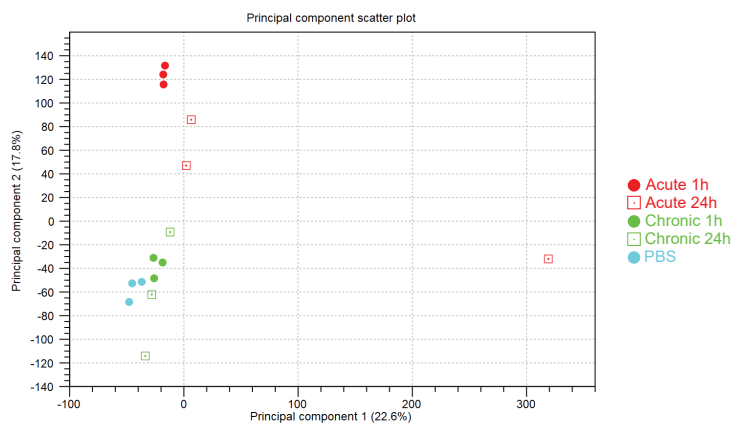

**Figure S3.** Heatmaps and Principal Component Analysis of Acute and Chronic Dopa-mine-dosed hMSN-like cells. Related to Figures 2 and 3. (A) 1  $\mu$ M acute (DIV45)/chronic (DIV50) dopamine dosing regimen and a (B) 1 mM acute/chronic dopamine dosing regimen. (Left) Heatmap visualization of normalized gene counts after hierarchical clustering across conditions. Each column is one replicate of the labeled condition. n = 3 independent replicates. (Right) Principal Component Analysis (PCA). Analysis performed in CLC Workbench.

**A**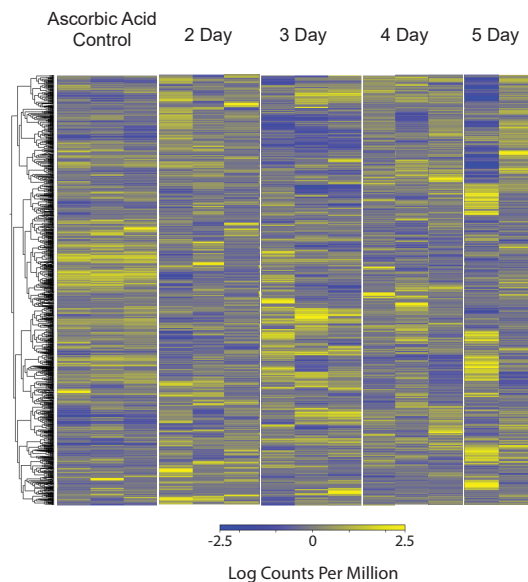**B**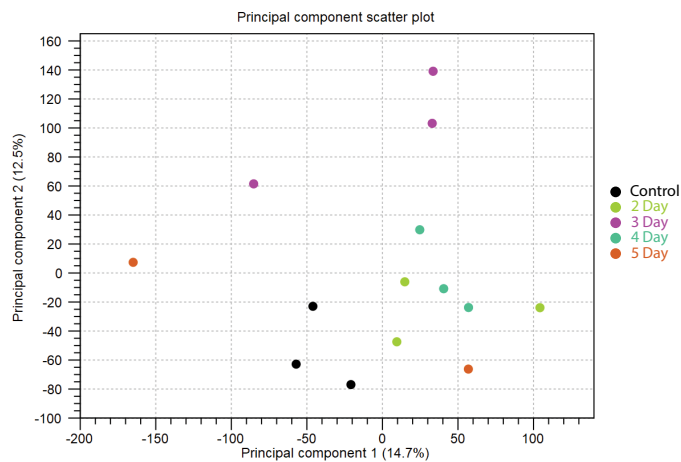

**Figure S4.** Heatmaps and Principal Component Analysis of Chronic Dopamine time course-dosed (DIV50) hMSN-like cells. Related to Figure 4. (A) Heatmap visualization of normalized gene counts after hierarchical clustering across conditions. Each column is one replicate of the labeled condition. n = 2-3 independent replicates. (B) Principal Component Analysis (PCA). Analysis performed in CLC Work-bench.



A

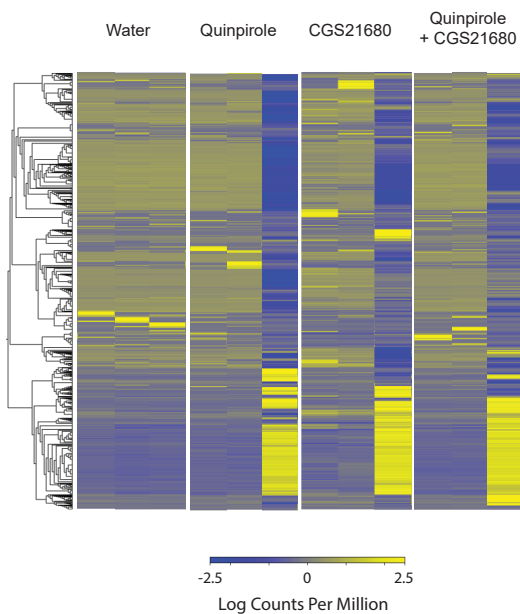

B

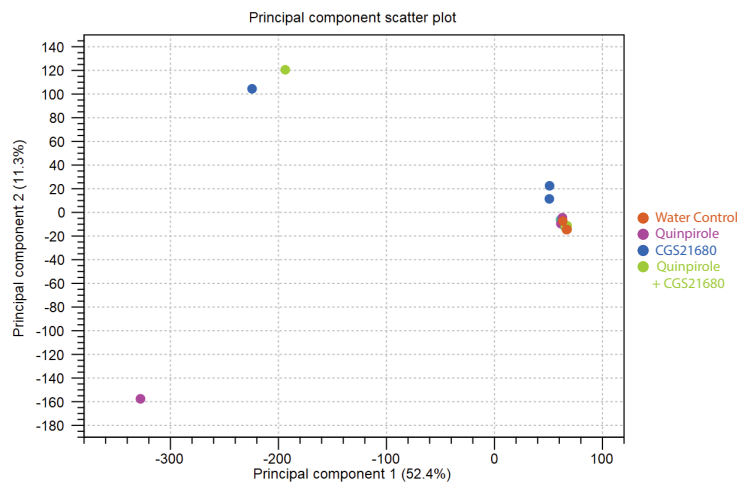

**Figure S5.** Heatmaps and Principal Component Analysis of DIV45 Agonist-dosed hMSN-like cells. Related to Figure 5. (A) Heatmap visualization of normalized gene counts after hierarchical clustering across conditions. Each column is one replicate of the labeled condition.  $n = 3$  independent replicates. (B) Principal Component Analysis (PCA). Analysis performed in CLC Workbench.

**Table S1. Primary antibodies. Related to Figure 1.**

| Antigen | Host    | Supplier        | Cat. No. | RRID        | Dilution |
|---------|---------|-----------------|----------|-------------|----------|
| DARPP32 | Goat    | R&D Systems     | AF6259   | AB_10641854 | 1:13     |
| MAP2    | Mouse   | Millipore Sigma | M1406    | AB_477171   | 1:375    |
| GFP     | Chicken | Abcam           | AB13970  | AB_300798   | 1:500    |

**Table S2. QRT-PCR Primers. Related to Figure 1.**

| <u>Gene Symbol</u> | <u>Gene ID</u> | <u>Forward Primer</u>  | <u>Reverse Primer</u>    |
|--------------------|----------------|------------------------|--------------------------|
| DRD1               | 1812           | AGGTATTGGGCTATCTCCAGC  | AGATGAGTACAGACAAGGTCCAT  |
| DRD2               | 1813           | CTCTTCGGACTCAATAACGCAG | GACGATGGAGGAGTAGACCAC    |
| FOXP1              | 27086          | AGGCCACAAAAGATCAGTGG   | GCCATTGAAGCCTGTAAAGC     |
| GAD2               | 2572           | CTATGACACTGGAGACAAGGC  | CAACATTTTATCAACATGCGCTTC |
| TAC1               | 6863           | GTACGACAGCGACCAGATCA   | AGCCTTTAACAGGGCCACTT     |
| PDYN               | 5173           | GGTGCTCCTTGTGTGCT      | CATCTCTCCCATTCTCAGA      |
| A2A                | 135            | AGGCAGCAAGAACCTTTCAA   | CTAAGGAGCTCCACGTCTGG     |
| PENK               | 5179           | GCTGTCCAAACCAGAGCTTC   | TCTGGCTCCATGGGATAAAG     |
| CTIP2              | 64919          | CAACCCGCAGCACTTGTC     | CCTCGTCTTCTTCGAGGATGG    |
| ARPP21             | 10777          | GTGCAAAGCGTGATGGTTTCC  | CCTTGACCTGCCTGGTTAGG     |
| CALB1              | 793            | ATCAGGACGGCAATGGATAC   | TAAGAGCAAGATCCGTTCCG     |
| GPR88              | 54112          | ATCCCGGTGTCACTCCTGTAT  | CACGAGATAGATGACCATGCC    |
| OPRM1              | 4988           | CAGCCATTGGTCTTCCTGTA   | TCAGCAGGTTTTCCAGTAC      |
| RARB               | 5915           | TCCGAAAAGCTCACCAGGAAA  | GGCCAGTTCACTGAATTTGTCC   |
| CHRM1              | 1128           | CTCTATACCACGTACCTGCTCA | CCGAGTCACGGAGAAGTAGC     |
| CHRM4              | 1132           | AGGACACTTCCAATGAGTCCA  | TGTCTGCTTCGTCACAATCTG    |
| GRIA1              | 2890           | TGCTTTGTCGCAACTCACAGA  | GGCATAGACTCCTTTGGAGAAC   |
| GRIA2              | 2891           | CACCCCACATCGACAATTTGG  | GACGTGGAGTGTTCGCAA       |
| GRIA3              | 2892           | TCCGGGCGGTCTTCTTTTATAG | TCCACCTATGCTGATGGTGTT    |
| GRIN1              | 2902           | CTACCGCATACCCGTGCTG    | GCATCATCTCAAACCACACGC    |
| GRIN2A             | 2903           | GTCCTTCTCCGACTGTGAGC   | CCTTGAGCATTCTTCACA       |
| GRIN2B             | 2904           | TCTTCCTGGCCAGCTACACT   | GGAACTTTTGTGCTCAGG       |
| GUSB               | 2990           | CAGCGTGGAGCAAGACAGTGG  | AATACAGATAGGCAGGGCGTTCG  |
| VASH2              | 79805          | TTGGCAAAGCCTTCAATACC   | GTAATTCTGGATCGCCTGGA     |
| PAQR6              | 79957          | CCTTCCCCTATGCCGCCTA    | GGAGGACCTTACTGAGCCC      |
| DARRP32            | 84152          | TTGGAAAATCCAGAAAACCG   | CTGGTAGAAGCCGGTGAGAG     |
| FOSB               | 2354           | AGCAGCAGCTAAATGCAGGA   | TTCGTAGGGGATCTTGCAGC     |

|        |      |                         |                        |
|--------|------|-------------------------|------------------------|
| FOS    | 2353 | GGGGCAAGGTGGAACAGTTA    | TCCTTCAGCAGGTTGGCAAT   |
| DRD3   | 1814 | TGGTAAACTCCTCGGTCTCCAGA | CAGAGATGCCATAGCCCAGAGG |
| DRD4   | 1815 | AACTCCTTCATCGTGAGCCT    | CGCACAGGTTGAAGATGGAG   |
| DRD5   | 1816 | TTGCTGAGTCTGTCTGGGAG    | TAAAGGGAGCAGCACTGGAA   |
| NKX2.1 | 2290 | GGACGTGAGCAAGAACATGG    | AACCAGATCTTGACCTGCGT   |
| SST    | 7080 | CTCCGTCAGTTTCTGCAGAA    | TCAGGTTCCAGGGCATCATT   |
| PVALB  | 6750 | AAAGAGTGCGGATGATGTGAAG  | ACCCCAATTTTGCCGTCCC    |
| FOXG1  | 5816 | CCCTGCCCTGTGAGTCTTTA    | GGTTGGAAGAAGACCCCTGA   |
| NR2F2  | 7026 | GGAGAAGCTCAAGGCGCTGCA   | CCTGCAAGCTTTCCACATGGG  |
